# Supplementary material for: Theoretical study of the charge transport mechanism in π-stacked systems of organic semiconductor crystals
Source: Royal Society of Chemistry journal article supplement (doi:10.1039/c7ce01359k), 2017-01-01
Supplement: c7ce01359k1.pdf [file c7ce01359k1.pdf]

Table S1. The bond length/Å of neutral and ionized optimized geometries for studied molecules 1-1 to 1-6

|             | 1     | 2     | 3     | 4     | 5     | 6     | 7     | 8     | 9     | 10    | 11    | 12    | 13    | 14    | 15    | 16    |
|-------------|-------|-------|-------|-------|-------|-------|-------|-------|-------|-------|-------|-------|-------|-------|-------|-------|
| <b>1-1</b>  | 1.422 | 1.362 | 1.438 | 1.405 | 1.429 | 1.429 | 1.405 | 1.438 | 1.362 |       |       |       | 1.444 | 1.474 | 1.444 | 1.422 |
| <b>1-1h</b> | 1.407 | 1.376 | 1.422 | 1.424 | 1.425 | 1.425 | 1.424 | 1.422 | 1.376 |       |       |       | 1.437 | 1.471 | 1.437 | 1.407 |
| <b>1-1e</b> | 1.405 | 1.379 | 1.425 | 1.426 | 1.426 | 1.426 | 1.426 | 1.425 | 1.379 |       |       |       | 1.442 | 1.475 | 1.442 | 1.405 |
| <b>1-2</b>  | 1.433 | 1.366 | 1.436 | 1.39  | 1.417 | 1.416 | 1.416 | 1.417 | 1.39  | 1.436 | 1.366 | 1.433 | 1.453 | 1.458 | 1.458 | 1.453 |
| <b>1-2h</b> | 1.42  | 1.377 | 1.423 | 1.404 | 1.406 | 1.422 | 1.422 | 1.406 | 1.404 | 1.423 | 1.377 | 1.42  | 1.446 | 1.456 | 1.456 | 1.446 |
| <b>1-2e</b> | 1.419 | 1.38  | 1.425 | 1.406 | 1.41  | 1.423 | 1.423 | 1.41  | 1.406 | 1.425 | 1.38  | 1.419 | 1.448 | 1.464 | 1.464 | 1.448 |
| <b>1-3</b>  | 1.433 | 1.366 | 1.436 | 1.388 | 1.418 | 1.414 | 1.414 | 1.418 | 1.388 | 1.436 | 1.366 | 1.433 | 1.451 | 1.459 | 1.459 | 1.451 |
| <b>1-3h</b> | 1.42  | 1.377 | 1.423 | 1.403 | 1.407 | 1.42  | 1.42  | 1.407 | 1.403 | 1.423 | 1.377 | 1.42  | 1.443 | 1.457 | 1.457 | 1.443 |
| <b>1-3e</b> | 1.419 | 1.379 | 1.425 | 1.405 | 1.41  | 1.421 | 1.421 | 1.41  | 1.405 | 1.425 | 1.379 | 1.419 | 1.445 | 1.464 | 1.464 | 1.445 |
| <b>1-4</b>  | 1.429 | 1.365 | 1.436 | 1.4   | 1.427 | 1.404 | 1.404 | 1.427 | 1.4   | 1.436 | 1.365 | 1.429 | 1.457 | 1.455 | 1.455 | 1.457 |
| <b>1-4h</b> | 1.415 | 1.376 | 1.426 | 1.42  | 1.42  | 1.408 | 1.408 | 1.42  | 1.42  | 1.426 | 1.376 | 1.415 | 1.449 | 1.453 | 1.453 | 1.449 |
| <b>1-4e</b> | 1.414 | 1.378 | 1.429 | 1.419 | 1.421 | 1.41  | 1.41  | 1.421 | 1.419 | 1.429 | 1.378 | 1.414 | 1.45  | 1.46  | 1.46  | 1.45  |
| <b>1-5</b>  | 1.423 | 1.373 | 1.452 | 1.39  | 1.417 | 1.414 | 1.414 | 1.417 | 1.39  | 1.452 | 1.373 | 1.423 | 1.459 | 1.454 | 1.454 | 1.459 |
| <b>1-5h</b> | 1.409 | 1.386 | 1.439 | 1.403 | 1.408 | 1.419 | 1.419 | 1.408 | 1.403 | 1.439 | 1.396 | 1.409 | 1.452 | 1.453 | 1.453 | 1.452 |
| <b>1-5e</b> | 1.407 | 1.388 | 1.442 | 1.405 | 1.41  | 1.42  | 1.42  | 1.41  | 1.405 | 1.442 | 1.388 | 1.407 | 1.455 | 1.457 | 1.457 | 1.455 |
| <b>1-6</b>  | 1.457 | 1.381 | 1.449 | 1.391 | 1.417 | 1.414 | 1.414 | 1.417 | 1.391 | 1.449 | 1.381 | 1.457 | 1.45  | 1.454 | 1.454 | 1.45  |
| <b>1-6h</b> | 1.444 | 1.395 | 1.436 | 1.405 | 1.407 | 1.419 | 1.419 | 1.407 | 1.405 | 1.436 | 1.395 | 1.444 | 1.444 | 1.453 | 1.453 | 1.444 |
| <b>1-6e</b> | 1.439 | 1.396 | 1.437 | 1.406 | 1.41  | 1.419 | 1.419 | 1.41  | 1.406 | 1.437 | 1.396 | 1.439 | 1.447 | 1.458 | 1.458 | 1.447 |

Table S2. The bond angle/° of neutral and ionized optimized geometries for studied molecules 1-1 to 1-6

|             | 17    | 18    | 19    | 20    | 21    |
|-------------|-------|-------|-------|-------|-------|
| <b>1-1</b>  | 121.8 | 120.5 | 120.5 | 121.8 |       |
| <b>1-1h</b> | 121.4 | 120   | 120   | 121.4 |       |
| <b>1-1e</b> | 122.4 | 121.2 | 121.2 | 122.4 |       |
| <b>1-2</b>  | 121   | 122.3 | 120.4 | 122.3 | 121   |
| <b>1-2h</b> | 120.5 | 122.1 | 119.8 | 122.1 | 120.5 |
| <b>1-2e</b> | 121.6 | 122.9 | 121.7 | 122.9 | 121.6 |
| <b>1-3</b>  | 120.9 | 122.4 | 120.2 | 122.4 | 120.9 |
| <b>1-3h</b> | 120.4 | 122.3 | 119.5 | 122.3 | 120.4 |
| <b>1-3e</b> | 121.5 | 123.1 | 121.5 | 123.1 | 121.5 |
| <b>1-4</b>  | 121.6 | 120.1 | 122.9 | 120.1 | 121.6 |
| <b>1-4h</b> | 121.3 | 119.3 | 123.3 | 119.3 | 121.3 |
| <b>1-4e</b> | 122.1 | 120.9 | 123.9 | 120.9 | 122.1 |
| <b>1-5</b>  | 118.6 | 123.1 | 119.9 | 123.1 | 118.6 |
| <b>1-5h</b> | 117.9 | 123   | 119.4 | 123   | 117.9 |
| <b>1-5e</b> | 119.2 | 123.8 | 121   | 123.8 | 119.2 |
| <b>1-6</b>  | 120.1 | 122.9 | 119.9 | 122.9 | 120.1 |
| <b>1-6h</b> | 119.5 | 122.9 | 119.5 | 122.9 | 119.5 |
| <b>1-6e</b> | 120.7 | 123.5 | 120.9 | 123.5 | 120.7 |

Table S3. The energies of IP, EA, HOMO, LUMO, H-L, and reorganization energies ( $\lambda_+$  and  $\lambda_-$ ) of the studied molecules 1-1 to 1-6 (all in eV)

| Compounds  | IP   | EA   | HOMO   | LUMO   | H-L   | $\lambda_+$ | $\lambda_-$ |
|------------|------|------|--------|--------|-------|-------------|-------------|
| <b>1-1</b> | 6.03 | 1.28 | -4.942 | -2.34  | 2.60  | 0.156       | 0.203       |
| <b>1-2</b> | 5.76 | 1.16 | -4.565 | -2.355 | 2.21  | 0.100       | 0.138       |
| <b>1-3</b> | 5.65 | 1.19 | -4.496 | -2.325 | 2.17  | 0.105       | 0.142       |
| <b>1-4</b> | 5.47 | 1.23 | -4.425 | -2.271 | 2.15  | 0.150       | 0.161       |
| <b>1-5</b> | 5.42 | 1.34 | -4.424 | -2.3   | 2.12  | 0.093       | 0.165       |
| <b>1-6</b> | 5.26 | 1.41 | -4.387 | -2.272 | 2.115 | 0.115       | 0.145       |

Table S4. The largest calculated electron and hole mobility (in  $\text{cm}^2 \text{V}^{-1} \text{s}^{-1}$ ) for the anisotropic mobility in ab plane  $\mu^a$  and all three planes  $\mu^b$  of molecule 1-4.

|   | $\mu^a_{\text{ele}}$ | $\mu^b_{\text{ele}}$ | $\mu^a_{\text{hole}}$ | $\mu^b_{\text{hole}}$ |
|---|----------------------|----------------------|-----------------------|-----------------------|
| 1 | 0.90                 | 0.90                 | 6.57                  | 6.57                  |
| 2 | 4.40                 | 4.40                 | 1.89                  | 1.88                  |
| 3 | 0.098                | 0.097                | 0.045                 | 0.044                 |
| 4 | 2.624E-4             | 1.070E-4             | 0.076                 | 0.051                 |

Table S5. The energies (all in eV) of IPs, EAs, HOMOs, LUMOs, H-Ls, and Reorganization Energies ( $\lambda_+$  and  $\lambda_-$ ) of the Studied Molecules

| Compounds | IP   | EA   | HOMO  | LUMO  | H-L  | $\lambda_+$ | $\lambda_-$ |
|-----------|------|------|-------|-------|------|-------------|-------------|
| <b>1</b>  | 6.03 | 1.28 | -4.94 | -2.34 | 2.60 | 0.156       | 0.203       |
| <b>2</b>  | 6.13 | 1.42 | -4.86 | -2.66 | 2.20 | 0.098       | 0.137       |
| <b>3</b>  | 7.92 | 3.27 | -6.96 | -4.27 | 2.69 | 0.243       | 0.327       |
| <b>4</b>  | 5.98 | 1.50 | -4.88 | -2.46 | 2.43 | 0.202       | 0.587       |

Table S6. The structural parameters ( $\theta_i/^\circ$ ,  $\gamma_i/^\circ$  and  $r_i/\text{\AA}$ ) and corresponding transfer integrals ( $V_h/\text{meV}$  and  $V_e/\text{meV}$ ) for molecules 1-4 along different hopping pathways

|   | pathway | $\theta_i$ | $\gamma_i$ | $r_i$  | $V_h$ | $V_e$ |
|---|---------|------------|------------|--------|-------|-------|
| 1 | P       | 0          | 0          | 7.174  | 86.62 | 42.78 |
|   | T1      | 63.435     | 0          | 8.054  | 16.39 | 6.68  |
|   | T2      | 116.565    | 0          | 8.054  | 16.39 | 6.68  |
|   | L1      | 0          | 75.024     | 13.88  | 1.42  | 0.58  |
|   | L2      | 0          | 104.976    | 13.88  | 1.42  | 0.58  |
|   | R1      | 63.435     | 65.043     | 15.207 | 0.30  | 0.25  |
|   | R2      | 63.435     | 65.043     | 15.207 | 0.30  | 0.25  |
| 2 | P       | 0          | 0          | 6.265  | 34.15 | 46.09 |
|   | T1      | 47.931     | 0          | 5.221  | 77.47 | 77.67 |
|   | T2      | 125.522    | 0          | 4.762  | 45.53 | 75.43 |
|   | L1      | 0          | 66.733     | 16.109 | 1.30  | 8.57  |
|   | L2      | 0          | 89.619     | 14.799 | 3.30  | 0.62  |
|   | L3      | 0          | 112.621    | 16.032 | 0.01  | 0     |
| 3 | P       | 0          | 0          | 7.070  | 5.79  | 6.15  |
|   | T1      | 75.359     | 0          | 13.987 | 0.99  | 1.22  |
|   | T2      | 104.641    | 0          | 13.987 | 0.121 | 1.69  |
|   | L1      | 75.359     | 59.680     | 15.068 | 0     | 0     |
| 4 | L2      | 90         | 59.680     | 13.306 | 0.49  | 0.76  |
|   | P       | 0          | 0          | 7.880  | 11.67 | 0.36  |
| 4 | T1      | 55.440     | 0          | 6.946  | 3.18  | 7.46  |

|    |         |         |       |       |       |
|----|---------|---------|-------|-------|-------|
| T2 | 124.560 | 0       | 6.946 | 3.18  | 7.46  |
| L1 | 0       | 66.485  | 9.875 | 26.10 | 10.77 |
| L2 | 0       | 113.515 | 9.875 | 26.10 | 10.80 |

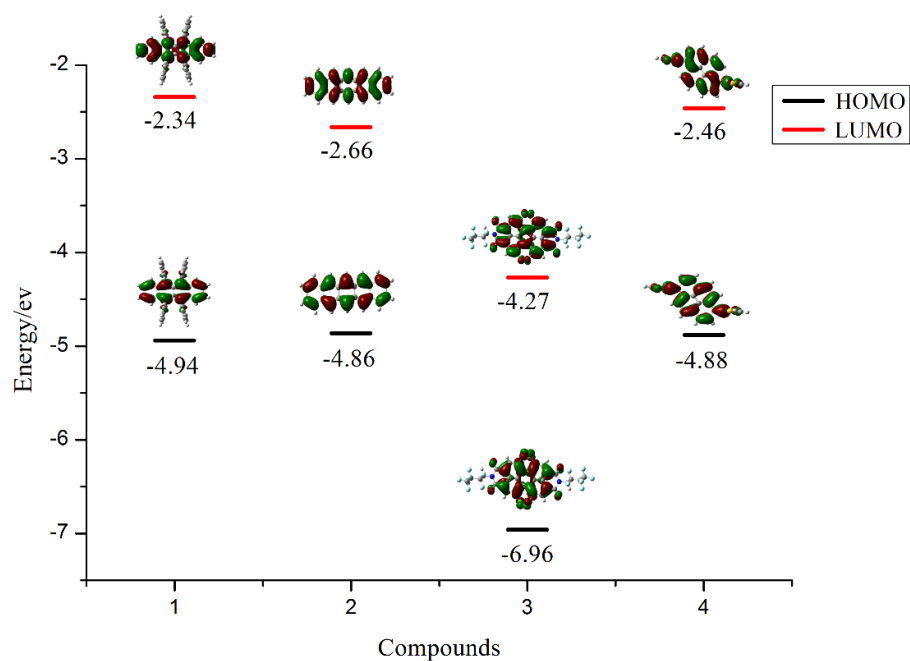

Figure S1. The energies (all in eV) and their electronic density contours of HOMOs and LUMOs for studied molecules 1-4
